# Supplementary material for: Identification and replication of novel genetic variants of ABO gene to reduce the incidence of diseases and promote longevity by modulating lipid homeostasis
Source: PubMed Central journal article supplement (PMC8660604; doi:10.18632/aging.203700), 2021-11-22
Supplement: aging-13-203700-s002.pdf [file aging-13-203700-s002.pdf]

## SUPPLEMENTARY TABLES

**Supplementary Table 1. Replication of ABO variants in healthy longevity.**

| Gene | ID(Ref/Alt)    | Group                      | Phase I + phase II of GWAS |              |              |            |              |              |            |       |             |
|------|----------------|----------------------------|----------------------------|--------------|--------------|------------|--------------|--------------|------------|-------|-------------|
|      |                |                            | Major homo                 | Hetro        | Minor homo   | P          | Minor allele | Major allele | P          | OR    | 95%CI       |
|      |                |                            | Case/control               | Case/control | Case/control | Bonferroni | Case/control | Case/control | Bonferroni |       |             |
| ABO  | rs8176719(-/C) | Longevity/Control          | 1679/1987                  | 2285/2989    | 824/1133     | 0.007      | 3933/5255    | 5643/6963    | 0.002      | 1.083 | 1.026-1.143 |
|      |                | Nonagenarians/Controls     | 1098/1987                  | 1460/2989    | 534/1133     | 0.007      | 2528/5255    | 3656/6963    | 0.003      | 1.091 | 1.026-1.161 |
|      |                | Centenarians/Controls      | 581/1987                   | 825/2989     | 290/1133     | 0.126      | 1405/5255    | 1987/6963    | 0.049      | 1.067 | 0.988-1.153 |
|      |                | Centenarians/Nonagenarians | 581/1098                   | 825/1460     | 290/534      | 0.307      | 1405/2528    | 1987/3656    | 0.304      | 0.978 | 0.898-1.065 |
|      | rs687621(A/G)  | Longevity/Control          | 1783/2167                  | 2458/3256    | 929/1293     | 0.012      | 4316/5842    | 6024/7590    | 0.004      | 1.074 | 1.020-1.131 |
|      |                | Nonagenarians/Controls     | 1229/2167                  | 1651/3256    | 630/1293     | 0.008      | 2911/5842    | 4109/7590    | 0.003      | 1.086 | 1.025-1.152 |
|      |                | Centenarians/Controls      | 554/2167                   | 807/3256     | 299/1293     | 0.227      | 1405/5842    | 1915/7590    | 0.111      | 1.049 | 0.971-1.133 |
|      | rs643434(G/A)  | Centenarians/Nonagenarians | 554/1229                   | 807/1651     | 299/630      | 0.240      | 1405/2911    | 1915/4109    | 0.206      | 0.966 | 0.888-1.050 |
|      |                | Longevity/Control          | 1982/2349                  | 2608/3363    | 964/1306     | 0.011      | 4536/5975    | 6572/8061    | 0.003      | 1.074 | 1.021-1.130 |
|      |                | Nonagenarians/Controls     | 1378/2349                  | 1765/3363    | 663/1306     | 0.007      | 3091/5975    | 4521/8061    | 0.003      | 1.084 | 1.024-1.147 |
|      | rs505922(T/C)  | Centenarians/Controls      | 604/2349                   | 843/3363     | 301/1306     | 0.185      | 1445/5975    | 2051/8061    | 0.083      | 1.052 | 0.976-1.134 |
|      |                | Centenarians/Nonagenarians | 604/1378                   | 843/1765     | 301/663      | 0.202      | 1445/3091    | 2051/4521    | 0.235      | 0.97  | 0.895-1.053 |
|      |                | Longevity/Control          | 1973/2348                  | 2612/3356    | 967/1316     | 0.013      | 4546/5988    | 6558/8052    | 0.003      | 1.073 | 1.020-1.128 |
|      |                | Nonagenarians/Controls     | 1374/2348                  | 1765/3356    | 665/1316     | 0.008      | 3095/5988    | 4513/8052    | 0.003      | 1.084 | 1.025-1.148 |
|      | rs505922(T/C)  | Centenarians/Controls      | 599/2348                   | 847/3356     | 302/1316     | 0.180      | 1451/5988    | 2045/8052    | 0.110      | 1.048 | 0.972-1.130 |
|      |                | Centenarians/Nonagenarians | 599/1374                   | 847/1765     | 302/665      | 0.162      | 1451/3095    | 2045/4513    | 0.206      | 0.967 | 0.891-1.048 |

**Supplementary Table 2. Hardy-Weinberg equilibrium of ABO variants in cases and controls.**

| P         | rs8176719 | rs687621 | rs643434 | rs505922 |
|-----------|-----------|----------|----------|----------|
| Longevity | 0.329     | 0.106    | 0.036    | 0.043    |
| Control   | 0.879     | 0.263    | 0.094    | 0.057    |

**Supplementary Table 3. Haplotype analysis of rs8176719, rs687621, rs643434 and rs505922 by APOE allele.**

| APOE | Haplotype | Longevity     | Control       | P                       | OR    | 95%CI       |
|------|-----------|---------------|---------------|-------------------------|-------|-------------|
| e3e3 | -AGT      | 3297.00(0.59) | 3940.00(0.57) | 0.047                   | 1.075 | 1.001-1.155 |
|      | CAGT      | 172.98(0.03)  | 689.00(0.10)  | 2.361*10 <sup>-46</sup> | 0.300 | 0.252-0.357 |
|      | CGGT      | 254.02(0.05)  | 326.01(0.05)  | 0.617                   | 0.958 | 0.810-1.133 |
|      | CGAC      | 1870.98(0.33) | 1937.99(0.28) | 1.340*10 <sup>-10</sup> | 1.285 | 1.190-1.387 |
| e2   | -AGT      | 914.00(0.59)  | 1002.00(0.56) | 0.105                   | 1.121 | 0.976-1.287 |
|      | CAGT      | 52.00(0.03)   | 204.00(0.12)  | 2.340*10 <sup>-18</sup> | 0.269 | 0.196-0.367 |
|      | CGGT      | 74.00(0.05)   | 93.00(0.05)   | 0.560                   | 0.911 | 0.666-1.246 |
|      | CGAC      | 503.00(0.33)  | 475.99(0.27)  | 2.720*10 <sup>-4</sup>  | 1.320 | 1.137-1.533 |
| e4   | -AGT      | 582.00(0.60)  | 812.00(0.56)  | 0.073                   | 1.163 | 0.986-1.372 |
|      | CAGT      | 31.00(0.03)   | 153.00(0.11)  | 1.770*10 <sup>-11</sup> | 0.278 | 0.187-0.413 |
|      | CGGT      | 35.00(0.04)   | 58.00(0.04)   | 0.604                   | 0.893 | 0.582-1.370 |
|      | CGAC      | 321.00(0.33)  | 417.00(0.29)  | 0.030                   | 1.215 | 1.019-1.449 |

**Supplementary Table 4. Base information of population in longevity and controls.**

| Characteristic  | Groups            |                  |                  |                   | Longevity vs. control       |       |                 | Nonagenarians vs. control   |       |                 | Centenarians vs. control    |       |                 | Nonagenarians vs. centenarians |       |                 |
|-----------------|-------------------|------------------|------------------|-------------------|-----------------------------|-------|-----------------|-----------------------------|-------|-----------------|-----------------------------|-------|-----------------|--------------------------------|-------|-----------------|
|                 | Controls          | Longevity        | Nonagenarians    | Centenarians      | P-value                     | OR    | 95% CI          | P-value                     | OR    | 95% CI          | P-value                     | OR    | 95% CI          | P-value                        | OR    | 95% CI          |
| N <sup>a</sup>  | 3259              | 2527             | 1455             | 1072              |                             |       |                 |                             |       |                 |                             |       |                 |                                |       |                 |
| Mean Age(yr)    | 70.000±<br>11.854 | 96.059±<br>5.470 | 93.000±<br>3.238 | 102.000±<br>2.235 |                             |       |                 |                             |       |                 |                             |       |                 |                                |       |                 |
| Sex             |                   |                  |                  |                   |                             |       |                 |                             |       |                 |                             |       |                 |                                |       |                 |
| Male            | 1067              | 369              | 288              | 105               | 1.575*<br>10 <sup>-57</sup> | 3.359 | 2.887-<br>3.907 | 5.539*<br>10 <sup>-25</sup> | 2.425 | 2.046-<br>2.876 | 8.048*<br>10 <sup>-65</sup> | 6.324 | 5.028-<br>7.955 | 6.063*<br>10 <sup>-14</sup>    | 2.608 | 2.021-<br>3.364 |
| Female          | 805               | 935              | 527              | 501               |                             |       |                 |                             |       |                 |                             |       |                 |                                |       |                 |
| Disease History |                   |                  |                  |                   |                             |       |                 |                             |       |                 |                             |       |                 |                                |       |                 |
| No              | 1738              | 1100             | 679              | 528               | 0.128                       | 0.744 | 0.507-<br>1.091 | 0.283                       | 0.783 | 0.500-<br>1.226 | 0.119                       | 0.658 | 0.388-<br>1.118 | 0.584                          | 0.841 | 0.452-<br>1.566 |
| Yes             | 85                | 40               | 26               | 17                |                             |       |                 |                             |       |                 |                             |       |                 |                                |       |                 |
| BMI             |                   |                  |                  |                   |                             |       |                 |                             |       |                 |                             |       |                 |                                |       |                 |
| Normal          | 997               | 749              | 504              | 319               | 2.359*<br>10 <sup>-3</sup>  | 0.736 | 0.604-<br>0.897 | 1.960*<br>10 <sup>-4</sup>  | 0.641 | 0.507-<br>0.811 | 0.497                       | 0.917 | 0.713-<br>1.179 | 0.019                          | 1.430 | 1.061-<br>1.928 |
| Abnormal        | 358               | 198              | 116              | 105               |                             |       |                 |                             |       |                 |                             |       |                 |                                |       |                 |
| Lipids          |                   |                  |                  |                   |                             |       |                 |                             |       |                 |                             |       |                 |                                |       |                 |
| Normal          | 1193              | 926              | 576              | 436               | 8.000*<br>10 <sup>-5</sup>  | 0.703 | 0.602-<br>0.821 | 3.950*10 <sup>-4</sup>      | 0.721 | 0.602-<br>0.864 | 8.100*<br>10 <sup>-4</sup>  | 0.662 | 0.539-<br>0.813 | 0.481                          | 0.918 | 0.723-<br>1.165 |
| Abnormal        | 649               | 354              | 226              | 157               |                             |       |                 |                             |       |                 |                             |       |                 |                                |       |                 |
| Blood pressure  |                   |                  |                  |                   |                             |       |                 |                             |       |                 |                             |       |                 |                                |       |                 |
| Normal          | 844               | 546              | 354              | 255               | 0.088                       | 1.133 | 0.981-<br>1.307 | 0.473                       | 1.063 | 0.900-<br>1.255 | 0.222                       | 1.123 | 0.932-<br>1.352 | 0.614                          | 1.057 | 0.853-<br>1.308 |
| Abnormal        | 1014              | 743              | 452              | 344               |                             |       |                 |                             |       |                 |                             |       |                 |                                |       |                 |
| Blood glucose   |                   |                  |                  |                   |                             |       |                 |                             |       |                 |                             |       |                 |                                |       |                 |
| Normal          | 1685              | 1166             | 721              | 553               | 0.827                       | 1.027 | 0.806-<br>1.310 | 0.322                       | 1.148 | 0.873-<br>1.510 | 0.223                       | 0.810 | 0.577-<br>1.137 | 0.068                          | 0.706 | 0.485-<br>1.027 |
| Abnormal        | 173               | 123              | 85               | 46                |                             |       |                 |                             |       |                 |                             |       |                 |                                |       |                 |

a: N, number.

**Supplementary Table 5. Base line of plasma lipids in different age groups.**

|     | N<br>(centenarians) | Mean±<br>Std    | N<br>(nonagenarians) | Mean±<br>std    | N<br>(controls) | Mean±<br>std    | N<br>(longevity) | Mean±<br>std    | P<br>(longevity vs.<br>controls) | P<br>(centenarians<br>vs.<br>controls) | P<br>(nonagenarians<br>vs.<br>controls) | P<br>(centenarians<br>vs.<br>nonagenarians) |
|-----|---------------------|-----------------|----------------------|-----------------|-----------------|-----------------|------------------|-----------------|----------------------------------|----------------------------------------|-----------------------------------------|---------------------------------------------|
| HDL | 581                 | 1.271±<br>0.311 | 979                  | 1.245±<br>0.345 | 2228            | 1.239±<br>0.365 | 1560             | 1.255±<br>0.333 | 0.154                            | 0.049                                  | 0.595                                   | 0.172                                       |
| LDL | 581                 | 2.407±<br>0.859 | 979                  | 2.300±<br>0.833 | 2228            | 2.459±<br>0.834 | 1560             | 2.340±<br>0.844 | 1.700*10 <sup>-5</sup>           | 0.182                                  | 7.669*10 <sup>-7</sup>                  | 0.015                                       |
| TG  | 581                 | 1.034±<br>0.598 | 979                  | 1.061±<br>0.720 | 2228            | 1.384±<br>1.211 | 1560             | 1.051±<br>0.677 | 1.275*10 <sup>-22</sup>          | 2.941*10 <sup>-13</sup>                | 2.522*10 <sup>-16</sup>                 | 0.625                                       |
| TC  | 581                 | 4.163±<br>1.058 | 979                  | 3.947±<br>1.145 | 2228            | 4.126±<br>1.197 | 1560             | 4.027±<br>1.118 | 0.011                            | 0.492                                  | 6.400*10 <sup>-5</sup>                  | 4.040*10 <sup>-4</sup>                      |

N, number.

**Supplementary Table 6. The comparison of phenotype selection bias.**

| Group     |          | N <sup>Phenotype (included)</sup> |         | N <sup>Phenotype (excluded)</sup> |         | N <sup>Total</sup> |         | Phenotype (included) vs. Total |                      | Phenotype (included) vs. phenotype (excluded) |                      |
|-----------|----------|-----------------------------------|---------|-----------------------------------|---------|--------------------|---------|--------------------------------|----------------------|-----------------------------------------------|----------------------|
|           |          | Longevity                         | Control | Longevity                         | Control | Longevity          | Control | P <sub>longevity</sub>         | P <sub>control</sub> | P <sub>longevity</sub>                        | P <sub>control</sub> |
| Sex       | Male     | 115                               | 885     | 254                               | 182     | 369                | 1067    | 0.588                          | 0.727                | 0.460                                         | 0.239                |
|           | Female   | 272                               | 684     | 663                               | 121     | 935                | 805     |                                |                      |                                               |                      |
|           | --       | 142                               | 498     | 1537                              | 1489    | 1679               | 1987    | 0.784                          | 0.298                | 0.751                                         | 0.130                |
| rs8176749 | -C       | 182                               | 800     | 2103                              | 2189    | 2285               | 2989    |                                |                      |                                               |                      |
|           | CC       | 63                                | 271     | 761                               | 862     | 824                | 1133    |                                |                      |                                               |                      |
|           | -        | 466                               | 1796    | 5177                              | 5167    | 5643               | 6963    | 0.487                          | 0.805                | 0.451                                         | 0.749                |
| rs687621  | C        | 308                               | 1342    | 3625                              | 3913    | 3933               | 5255    |                                |                      |                                               |                      |
|           | AA       | 168                               | 595     | 1615                              | 1572    | 1783               | 2167    | 0.594                          | 0.387                | 0.536                                         | 0.197                |
|           | AG       | 210                               | 884     | 2248                              | 2372    | 2458               | 3256    |                                |                      |                                               |                      |
|           | GG       | 78                                | 321     | 851                               | 972     | 929                | 1293    |                                |                      |                                               |                      |
|           | A        | 546                               | 2074    | 5478                              | 5516    | 6024               | 7590    | 0.345                          | 0.235                | 0.302                                         | 0.118                |
| rs643434  | G        | 366                               | 1526    | 3950                              | 4316    | 4316               | 5842    |                                |                      |                                               |                      |
|           | GG       | 194                               | 638     | 1788                              | 1711    | 1982               | 2349    | 0.687                          | 0.348                | 0.636                                         | 0.165                |
|           | GA       | 235                               | 913     | 2373                              | 2450    | 2608               | 3363    |                                |                      |                                               |                      |
|           | AA       | 87                                | 321     | 877                               | 985     | 964                | 1306    |                                |                      |                                               |                      |
|           | G        | 623                               | 2189    | 5949                              | 5872    | 6572               | 8061    | 0.452                          | 0.254                | 0.409                                         | 0.134                |
| rs505922  | A        | 409                               | 1555    | 4127                              | 4420    | 4536               | 5975    |                                |                      |                                               |                      |
|           | TT       | 193                               | 638     | 1780                              | 1710    | 1973               | 2348    | 0.717                          | 0.289                | 0.669                                         | 0.120                |
|           | TC       | 236                               | 912     | 2376                              | 2444    | 2612               | 3356    |                                |                      |                                               |                      |
|           | CC       | 88                                | 321     | 879                               | 995     | 967                | 1316    |                                |                      |                                               |                      |
|           | T        | 622                               | 2188    | 5936                              | 5864    | 6558               | 8052    | 0.493                          | 0.218                | 0.452                                         | 0.105                |
| Lipids    | C        | 412                               | 1554    | 4134                              | 4434    | 4546               | 5988    |                                |                      |                                               |                      |
|           | Normal   | 678                               | 968     | 248                               | 225     | 926                | 1193    | 0.756                          | 0.568                | 0.422                                         | 0.088                |
| BMI       | Abnormal | 267                               | 505     | 87                                | 144     | 354                | 649     |                                |                      |                                               |                      |
|           | Normal   | 503                               | 811     | 246                               | 186     | 749                | 997     | 0.299                          | 0.934                | 0.328                                         | 0.798                |
|           | Abnormal | 151                               | 289     | 86                                | 69      | 198                | 358     |                                |                      |                                               |                      |

N, number.

**Supplementary Table 7. Association between genotype and plasma lipid levels in longevity and controls.**

| rs8176719      | Longevity   |             |             |             | Control                |                        |             |             |
|----------------|-------------|-------------|-------------|-------------|------------------------|------------------------|-------------|-------------|
|                | HDL         | LDL         | TG          | TC          | HDL                    | LDL                    | TG          | TC          |
| --             | 1.270±0.361 | 2.320±0.879 | 1.131±0.789 | 4.091±1.195 | 1.244±0.365            | 2.465±0.825            | 1.478±1.189 | 4.041±1.252 |
| -C             | 1.274±0.334 | 2.432±0.935 | 1.131±0.746 | 4.138±1.247 | 1.257±0.358            | 2.545±0.865            | 1.468±1.420 | 4.161±1.297 |
| CC             | 1.292±0.340 | 2.439±0.935 | 1.097±0.849 | 4.184±1.231 | 1.209±0.375            | 2.456±0.822            | 1.412±1.331 | 4.191±1.187 |
| P(-- VS.CC)    | 0.430       | 0.664       | 0.652       | 0.387       | 0.237                  | 0.271                  | 0.350       | 0.721       |
| P(-C VS.CC)    | 0.387       | 0.446       | 0.571       | 0.466       | 0.201                  | 0.376                  | 0.709       | 0.784       |
| -C+CC          | 1.279±0.336 | 2.434±0.934 | 1.122±0.774 | 4.150±1.242 | 1.245±0.363            | 2.523±0.855            | 1.454±1.397 | 4.169±1.269 |
| P(-C+CC VS.--) | 0.123       | 0.817       | 0.674       | 0.457       | 0.914                  | 0.524                  | 0.321       | 0.682       |
| rs687621       |             |             |             |             |                        |                        |             |             |
| AA             | 1.217±0.324 | 2.228±0.825 | 1.201±0.918 | 3.850±1.196 | 1.235±0.356            | 2.448±0.827            | 1.598±1.278 | 3.916±1.371 |
| AG             | 1.267±0.321 | 2.414±0.900 | 1.059±0.634 | 4.143±1.127 | 1.256±0.367            | 2.553±0.849            | 1.360±1.338 | 4.266±1.174 |
| GG             | 1.204±0.281 | 2.176±0.820 | 0.925±0.436 | 3.856±1.006 | 1.152±0.379            | 2.267±0.951            | 1.709±1.766 | 4.157±1.188 |
| P(AA VS.GG)    | 0.867       | 0.484       | 0.961       | 0.768       | 0.009                  | 0.271                  | 0.16        | 0.435       |
| P(AG VS.GG)    | 0.514       | 0.457       | 0.644       | 0.406       | 0.007                  | 0.006                  | 0.086       | 0.108       |
| AG+GG          | 1.263±0.319 | 2.397±0.897 | 1.049±0.623 | 4.124±1.120 | 1.251±0.368            | 2.539±0.856            | 1.376±1.362 | 4.261±1.175 |
| P(AG+GG VS.AA) | 0.122       | 0.847       | 0.394       | 0.449       | 0.826                  | 0.442                  | 0.097       | 0.511       |
| rs643434       |             |             |             |             |                        |                        |             |             |
| GG             | 1.217±0.324 | 2.224±0.827 | 1.198±0.918 | 3.845±1.198 | 1.240±0.360            | 2.488±0.862            | 1.605±1.528 | 3.998±1.379 |
| GA             | 1.264±0.322 | 2.400±0.903 | 1.053±0.631 | 4.126±1.133 | 1.254±0.367            | 2.525±0.827            | 1.326±1.104 | 4.258±1.134 |
| AA             | 1.235±0.247 | 2.409±0.695 | 0.994±0.378 | 4.162±0.688 | 1.054±0.347            | 2.251±0.975            | 1.329±1.165 | 3.907±1.083 |
| P(GG VS.AA)    | 0.966       | 0.690       | 0.823       | 0.804       | 0.013                  | 0.289                  | 0.358       | 0.988       |
| P(GA VS.AA)    | 0.832       | 0.850       | 0.338       | 0.974       | 3.000*10 <sup>-6</sup> | 9.890*10 <sup>-4</sup> | 0.873       | 0.041       |
| GA+AA          | 1.263±0.319 | 2.400±0.895 | 1.051±0.623 | 4.127±1.118 | 1.250±0.367            | 2.519±0.831            | 1.326±1.105 | 4.251±1.134 |
| P(GA+AA VS.GG) | 0.133       | 0.860       | 0.377       | 0.440       | 0.686                  | 0.498                  | 0.056       | 0.421       |
| rs505922       |             |             |             |             |                        |                        |             |             |
| TT             | 1.217±0.324 | 2.224±0.827 | 1.198±0.918 | 3.845±1.198 | 1.240±0.360            | 2.488±0.862            | 1.605±1.528 | 3.998±1.379 |
| TC             | 1.264±0.322 | 2.400±0.903 | 1.053±0.631 | 4.126±1.133 | 1.254±0.367            | 2.526±0.827            | 1.327±1.104 | 4.260±1.134 |
| CC             | 1.235±0.247 | 2.409±0.695 | 0.994±0.378 | 4.162±0.688 | 1.067±0.340            | 2.194±0.973            | 1.271±1.513 | 3.837±1.088 |
| P(TT VS.CC)    | 0.966       | 0.690       | 0.823       | 0.804       | 0.034                  | 0.060                  | 0.477       | 0.896       |
| P(TC VS.CC)    | 0.832       | 0.850       | 0.338       | 0.974       | 2.200*10 <sup>-5</sup> | 0.004                  | 0.867       | 0.045       |
| TC+CC          | 1.263±0.319 | 2.400±0.895 | 1.051±0.623 | 4.127±1.118 | 1.250±0.367            | 2.519±0.831            | 1.326±1.105 | 4.251±1.134 |
| P(TC+CC VS.TT) | 0.133       | 0.860       | 0.377       | 0.440       | 0.686                  | 0.498                  | 0.056       | 0.421       |
