# Supplementary material for: Identification and replication of novel genetic variants of ABO gene to reduce the incidence of diseases and promote longevity by modulating lipid homeostasis
Source: publisher site journal article supplement (doi:10.18632/aging.203700), 2021-11-22
Supplement: Supplementary file [file aging-v13i22-203700-supplementary-material-SD4.pdf]

**Supplementary Table 9. Comparison of genotype frequencies with normal TG level between the longevity and the control group.**

| SNP       | Genetic model   |          | Longevity | Control | P                      | OR    | 95% CI      |
|-----------|-----------------|----------|-----------|---------|------------------------|-------|-------------|
|           |                 |          | TG≤1.7    | TG≤1.7  |                        |       |             |
| rs8176719 | Dominant Model  | N(--)    | 317       | 366     | ref                    |       |             |
|           |                 | N(CC+-C) | 566       | 810     | 0.023                  | 0.807 | 0.671-0.971 |
| rs687621  | Recessive Model | N(AA+AG) | 767       | 1142    | ref                    |       |             |
|           |                 | N(GG)    | 37        | 34      | 0.044                  | 1.620 | 1.008-2.604 |
| rs643434  | Dominant Model  | N(GG)    | 278       | 541     | ref                    |       |             |
|           |                 | N(AA+GA) | 526       | 635     | 3.977*10 <sup>-7</sup> | 1.612 | 1.340-1.940 |
| rs505922  | Dominant Model  | N(TT)    | 278       | 541     | ref                    |       |             |
|           |                 | N(CC+TC) | 526       | 635     | 3.977*10 <sup>-7</sup> | 1.612 | 1.340-1.940 |

N, number.

**Supplementary Table 10. Analysis of plasma lipid levels and healthy-associated haplotypes.**

| HDL  | Longevity |         |       |       |             | Nonagenarians |         |                        |       |             | Centenarians |         |       |       |             |
|------|-----------|---------|-------|-------|-------------|---------------|---------|------------------------|-------|-------------|--------------|---------|-------|-------|-------------|
|      | Case      | Control | P     | OR    | 95%CI       | Case          | Control | P                      | OR    | 95%CI       | Case         | Control | P     | OR    | 95%CI       |
| -AGT | 280       | 797     | -     | -     | -           | 147           | 322     | -                      | -     | -           | 133          | 475     | -     | -     | -           |
| CAGT | 31        | 92      | 0.849 | 0.959 | 0.624-1.473 | 18            | 39      | 0.971                  | 1.011 | 0.560-1.827 | 13           | 53      | 0.683 | 0.876 | 0.464-1.655 |
| CGAC | 142       | 464     | 0.244 | 0.871 | 0.691-1.099 | 70            | 172     | 0.507                  | 0.891 | 0.635-1.252 | 72           | 292     | 0.438 | 0.881 | 0.638-1.215 |
| LDL  |           |         |       |       |             |               |         |                        |       |             |              |         |       |       |             |
| -AGT | 120       | 957     | -     | -     | -           | 39            | 430     | -                      | -     | -           | 81           | 527     | -     | -     | -           |
| CAGT | 23        | 100     | 0.014 | 1.834 | 1.122-2.998 | 10            | 47      | 0.024                  | 2.346 | 1.100-5.002 | 13           | 53      | 0.156 | 1.596 | 0.833-3.057 |
| CGAC | 86        | 520     | 0.067 | 1.319 | 0.980-1.775 | 27            | 215     | 0.216                  | 1.385 | 0.825-2.323 | 59           | 305     | 0.215 | 1.259 | 0.875-1.811 |
| TG   |           |         |       |       |             |               |         |                        |       |             |              |         |       |       |             |
| -AGT | 132       | 943     | -     | -     | -           | 67            | 402     | -                      | -     | -           | 65           | 541     | -     | -     | -           |
| CAGT | 22        | 101     | 0.078 | 1.556 | 0.948-2.555 | 15            | 42      | 0.018                  | 2.143 | 1.126-4.079 | 7            | 59      | 0.976 | 0.987 | 0.433-2.253 |
| CGAC | 59        | 547     | 0.115 | 0.771 | 0.557-1.066 | 23            | 219     | 0.069                  | 0.630 | 0.382-1.040 | 35           | 328     | 0.591 | 0.888 | 0.576-1.370 |
| TC   |           |         |       |       |             |               |         |                        |       |             |              |         |       |       |             |
| -AGT | 157       | 918     | -     | -     | -           | 60            | 409     | -                      | -     | -           | 97           | 509     | -     | -     | -           |
| CAGT | 23        | 100     | 0.229 | 1.345 | 0.829-2.182 | 9             | 48      | 0.527                  | 1.278 | 0.597-2.738 | 14           | 52      | 0.279 | 1.413 | 0.753-2.649 |
| CGAC | 103       | 503     | 0.193 | 1.197 | 0.913-1.570 | 37            | 205     | 0.358                  | 1.230 | 0.790-1.915 | 66           | 298     | 0.391 | 1.162 | 0.824-1.639 |
| HDL  |           |         |       |       |             |               |         |                        |       |             |              |         |       |       |             |
| CAGT | 31        | 92      | -     | -     | -           | 18            | 39      | -                      | -     | -           | 13           | 53      | -     | -     | -           |
| CGAC | 142       | 464     | 0.674 | 0.908 | 0.580-1.422 | 70            | 172     | 0.693                  | 0.882 | 0.473-1.645 | 72           | 292     | 0.988 | 1.005 | 0.520-1.943 |
| LDL  |           |         |       |       |             |               |         |                        |       |             |              |         |       |       |             |
| CAGT | 23        | 100     | -     | -     | -           | 10            | 47      | -                      | -     | -           | 13           | 53      | -     | -     | -           |
| CGAC | 86        | 520     | 0.201 | 0.719 | 0.433-1.194 | 27            | 215     | 0.188                  | 0.590 | 0.268-1.302 | 59           | 305     | 0.485 | 0.789 | 0.405-1.538 |
| TG   |           |         |       |       |             |               |         |                        |       |             |              |         |       |       |             |
| CAGT | 22        | 101     | -     | -     | -           | 15            | 42      | -                      | -     | -           | 7            | 59      | -     | -     | -           |
| CGAC | 59        | 547     | 0.009 | 0.495 | 0.290-0.844 | 23            | 219     | 6.000*10 <sup>-4</sup> | 0.294 | 0.142-0.610 | 35           | 328     | 0.808 | 0.899 | 0.382-2.120 |
| TC   |           |         |       |       |             |               |         |                        |       |             |              |         |       |       |             |
| CAGT | 23        | 100     | -     | -     | -           | 9             | 48      | -                      | -     | -           | 14           | 52      | -     | -     | -           |
| CGAC | 103       | 503     | 0.649 | 0.890 | 0.540-1.468 | 37            | 205     | 0.925                  | 0.963 | 0.435-2.128 | 66           | 298     | 0.554 | 0.823 | 0.430-1.572 |

**Supplementary Table 11. Primers of sequencing genotyping.**

| <b>Variants</b> | <b>Forward primer</b>   | <b>Reverse primer</b> | <b>Product length</b> |
|-----------------|-------------------------|-----------------------|-----------------------|
| rs8176719       | TGAACTGCTCGTTGAGGATG    | GTGGTCAGAGGAGGCAGAAG  | 185bp                 |
| rs687621        | GCCACGCACTTCGACCTAT     | GGGCTTAGGACCCCGTAAC   | 782bp                 |
| rs643434        | CACATTACCTTAGCACCCCTT   | CTGAGGTGAGAGGATGACTT  | 432bp                 |
| rs505922        | AACTGTGTTTGCCATCAAGAAAT | CCCACCATGAAGTGCTTCTC  | 456bp                 |
